# Supplementary material for: Atmospheric Methane Consumption and Methanotroph Communities in West Siberian Boreal Upland Forest Ecosystems
Source: MDPI journal article supplement (doi:10.3390/f12121738), 2021-12-09
Supplement: s1 [file s1]

**Table S1.** Regression models for soil CH<sub>4</sub> oxidation rate (N = 72).

| Model                              | P                     | R <sub>adj</sub> <sup>2</sup> | RMSE | Residuals distribution | Spearman ρ <sup>2</sup> |
|------------------------------------|-----------------------|-------------------------------|------|------------------------|-------------------------|
| a·WFPS <sup>b</sup>                | $7.9 \times 10^{-12}$ | 0.49                          | 1.42 | Non-normal             | 0.50                    |
| a·MSM <sup>b</sup>                 | $1.4 \times 10^{-6}$  | 0.01                          | 1.99 | Non-normal             | 0.01                    |
| a + VSM <sup>b</sup>               | $6.3 \times 10^{-9}$  | 0.38                          | 1.57 | Non-normal             | 0.38                    |
| a + b·T                            | $4.4 \times 10^{-6}$  | 0.25                          | 1.72 | Non-normal             | 0.40                    |
| a + b·ln(NoC)                      | $1.1 \times 10^{-6}$  | 0.28                          | 1.69 | Non-normal             | 0.61                    |
| a·C <sup>2</sup> + b·C + c         | 0.008                 | 0.11                          | 1.88 | Non-normal             | 0.05                    |
| a + b·NO <sub>3</sub> <sup>-</sup> |                       | No significant model          |      |                        | 0.13                    |
| a + b·NH <sub>4</sub> <sup>+</sup> |                       | No significant model          |      |                        | 0.00                    |
| a + b·pH                           |                       | No significant model          |      |                        | 0.02                    |

WFPS – water-filled pore space, MSM – soil moisture by mass, VSM – soil moisture by volume, T – soil temperature °C, NoC – number of pmoA gene copies per g<sub>DW</sub>, NO<sub>3</sub><sup>-</sup> - soluble nitrate concentration μgN g<sub>DW</sub><sup>-1</sup>, NH<sub>4</sub><sup>+</sup> - soluble nitrate concentration μgN g<sub>DW</sub><sup>-1</sup>, pH – soil pH, (a, b, c) – model parameters.

**Table S2.** Comparison of simple regression model and mixed effect models with season and forest type as tested random variables.

| Fixed model           | Random variable | Log-likelihood | AIC    | Δ AIC |
|-----------------------|-----------------|----------------|--------|-------|
| a + WFPS <sup>b</sup> | None            | -125.25        | 254.50 | 0     |
| a + WFPS <sup>b</sup> | Season          | -126.25        | 262.50 | 8     |
| a + WFPS <sup>b</sup> | Forest type     | -126.25        | 262.50 | 8     |

**Table S3.** Regression models at the specified depth, depicted on a Figure 4.

| Letter | Depth     | Model                              | P                     | R <sub>adj</sub> <sup>2</sup> | RMSE | Sp <sup>2</sup> | Residuals distribution |
|--------|-----------|------------------------------------|-----------------------|-------------------------------|------|-----------------|------------------------|
| a      | 3         | a + WFPS <sup>b</sup>              | 0.003                 | 0.40                          | 2.11 | 0.54            | Normal                 |
| a      | 10        | a + b·exp(WFPS)                    | 0.19                  | 0.05                          | 1.46 | 0.19            | Non-normal             |
| a      | 20 and 30 | a + b·exp(WFPS)                    | 0.15                  | 0.03                          | 0.71 | 0.10            | Non-normal             |
| b      | 3 and 10  | a + b·log(NoC)                     | 0.07                  | 0.07                          | 2.28 | 0.12            | Non-normal             |
| b      | 20 and 30 | a + b·NoC                          | $3.1 \times 10^{-16}$ | 0.82                          | 0.62 | 0.40            | Normal                 |
| c      | 3         | a + b·exp(C)                       | 0.08                  | 0.13                          | 2.54 | 0.20            | Normal                 |
| c      | 10        | a + C <sup>b</sup>                 | $4.8 \times 10^{-4}$  | 0.54                          | 1.02 | 0.57            | Normal                 |
| c      | 20 and 30 | a + b·C                            | 0.27                  | 0.01                          | 1.26 | 0.19            | Non-normal             |
| d      | 3         | a + b·NH <sub>4</sub> <sup>+</sup> | 0.41                  | -0.01                         | 2.28 | 0.05            | Non-normal             |
| d      | 3         | a + b·NO <sub>3</sub> <sup>-</sup> | 0.39                  | -0.01                         | 2.27 | 0.05            | Non-normal             |

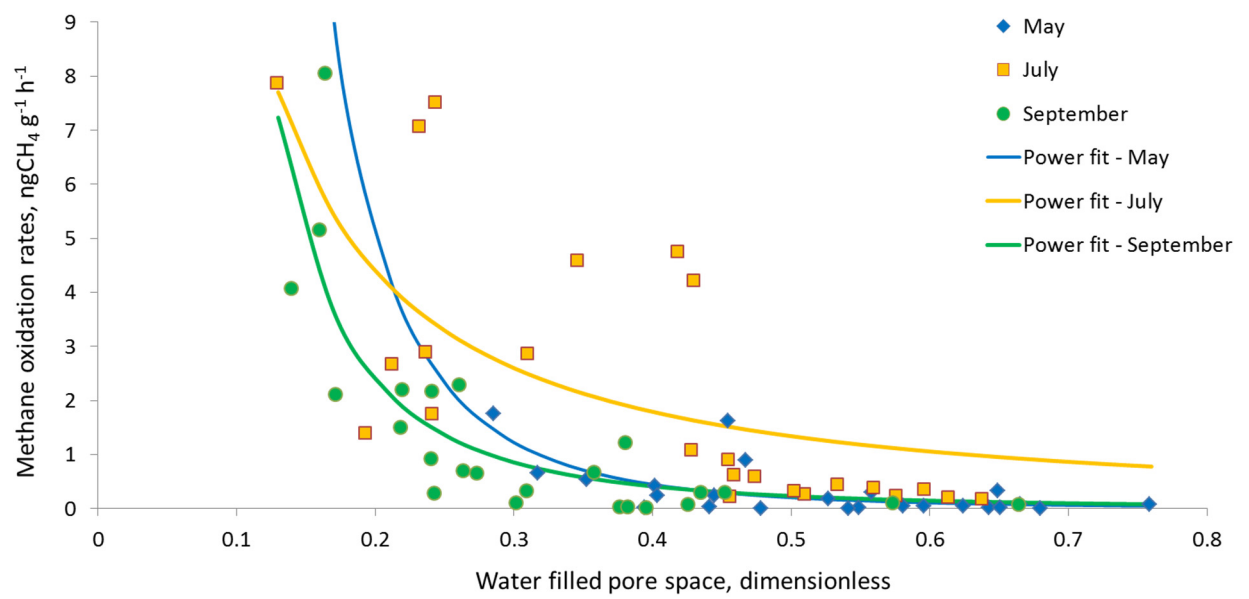

**Figure S1.** Power models fitted for soil CH<sub>4</sub> oxidation rate versus water-filled pore space for all data and for each season separately.
